# Supplementary material for: IL-10 induces aberrant deletion of dendritic cells by natural killer cells in the context of HIV infection
Source: JCI journal article supplement (doi:10.1172/jci40913), 2010-05-03

**Supplemental Figure 1. IL-10 alters DC phenotype even at 100-fold lower cytokine concentrations.** The line graphs depict the mean+SEM fluorescence intensity of DC phenotypic markers following treatment with IL-10 at 40ng/ml, 4ng/ml, and 0.4ng/ml on immature DCs (black) or mature DCs (grey line). Statistically significant differences are also indicated in black for immature DCs or grey for mature DCs.

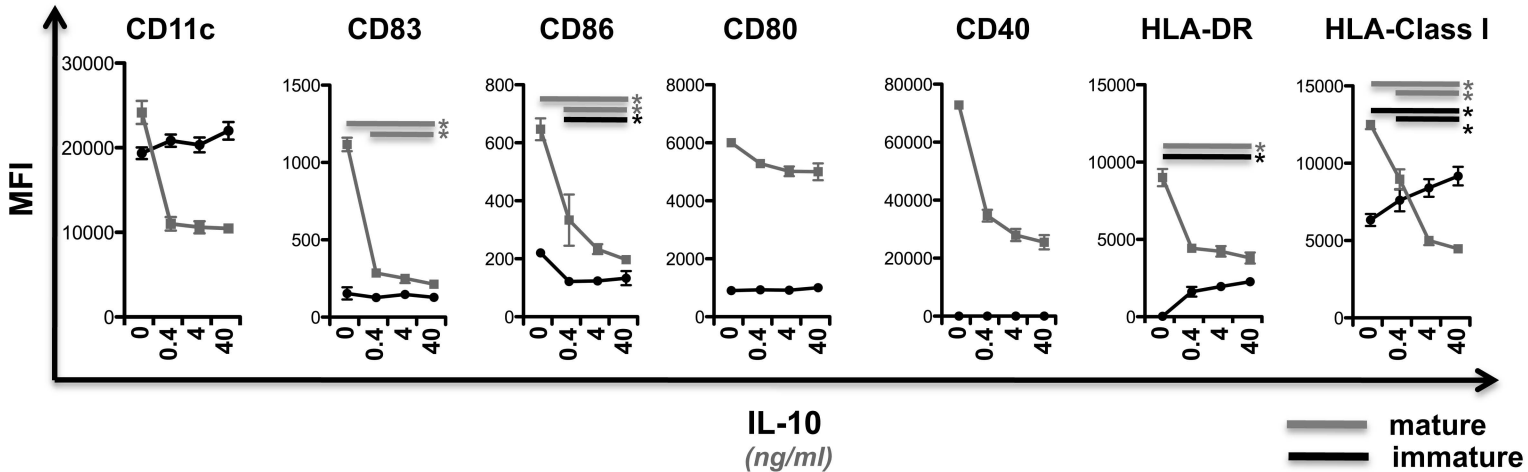

Supplement: sd1 [file 1]
